# Supplementary material for: Small molecule inhibition of RNA binding proteins in haematologic cancer
Source: PubMed Central journal article supplement (PMC10857685; doi:10.1080/15476286.2024.2303558), 2024-02-08
Supplement: KRNB_A_2303558_SM2456.pdf [file KRNB_A_2303558_SM2456.pdf]

| Target | Name                  | Structure | IC <sub>50</sub> | Ref.       |
|--------|-----------------------|-----------|------------------|------------|
|        | E7107 (7.1)           |           | 3.2 nM           | 52, 53, 56 |
|        | H3B-8800 (7.2)        |           | 13 nM            | 57, 58     |
| SF3B1  | Pladienolide B (7.3)  |           | 0.9 nM           | 53         |
|        | Spliceostatin A (7.4) |           | 31 nM            | 54         |
|        | FR901464 (7.5)        |           | 0.3 nM           | 54         |
|        | Sudemycinol C (7.6)   |           | 0.97 μM          | 55         |
|        | Sudemycinol E (7.7)   |           | 316 μM           | 55         |
| SRSF1  | cp028 (7.8)           |           | 54 μM            | 60         |

| Target | Name              | Structure                                                                            | IC <sub>50</sub> | Ref.       |
|--------|-------------------|--------------------------------------------------------------------------------------|------------------|------------|
|        | Indisulam (7.9)   | 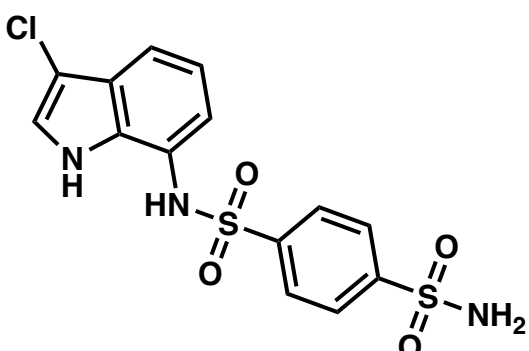   | 0.56 μM          | 62, 63, 64 |
| RBM39  | CQS (7.10)        |    | 7.1 μM           | 62         |
|        | Tasisulam (7.11)  |   | 6.5 μM           | 62         |
|        | Compound 8 (7.12) |  | 0.91 μM          | 66         |
| BRR2   | 32a (7.13)        |  | 0.48 μM          | 66         |
|        | 33a (7.14)        |  | 0.35 μM          | 66         |
| NONO   | SKBG01 (7.15)     |  | 5.7 μM           | 67         |
| METTL3 | STM2457 (8.1)     |  | 17 nM            | 72         |

| Target  | Name               | Structure                                                                            | IC <sub>50</sub> | Ref. |
|---------|--------------------|--------------------------------------------------------------------------------------|------------------|------|
|         | Compound III (8.2) | 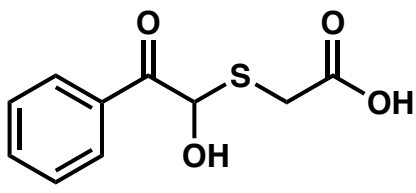   | 0.84 μM          | 76   |
| ALKBH5  | Compound IV (8.3)  |    | 1.8 μM           | 76   |
|         | CS1 (8.4)          |   | 22–176 nM        | 77   |
| FTO     | CS2 (8.5)          |  | 56–211 nM        | 77   |
| XPO1    | Selinexor (9.1)    |  | 34–203 nM        | 79   |
| hnRNP K | Compound 25 (9.2)  |  | 1.4–3.6 μM       | 81   |
| YTHDC1  | YL-5092 (9.3)      |  | 7.4 nM           | 83   |

| Target | Name                 | Structure                                                                            | IC <sub>50</sub> | Ref.       |
|--------|----------------------|--------------------------------------------------------------------------------------|------------------|------------|
|        | LI71 (10.1)          | 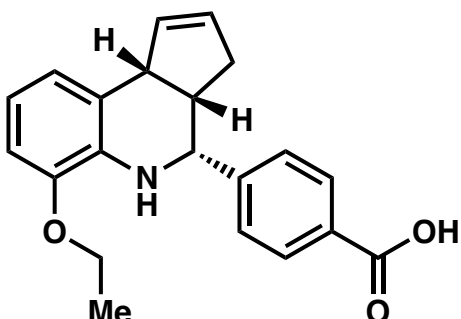   | 7 μM             | 88         |
|        | Compound 1632 (10.2) |    | 8 μM             | 43, 89, 90 |
|        | KCB170522 (10.3)     |   | 9.6 μM           | 43, 89, 90 |
| LIN28  | SB1301 (10.4)        |  | 4 μM             | 41         |
|        | PH-43 (10.5)         |  | 5 μM             | 43         |
|        | C902 (10.6)          |  | 5 μM             | 43         |

| Target      | Name              | Structure | IC <sub>50</sub> | Ref.  |
|-------------|-------------------|-----------|------------------|-------|
| LIN28 cont. | CCG-233094 (10.7) |           | 8 μM             | 47    |
|             | CCG-234459 (10.8) |           | 10 μM            | 47    |
| TARBP2/TRBP | CIB-3b (10.9)     |           | 12 μM            | 92    |
| IGF2BP1     | BTYNB (11.1)      |           | 2.3–4.5 μM       | 97–99 |
|             | 7773 (11.2)       |           | 30 μM            | 98    |
| IGF2BP2     | JX5 (11.3)        |           | N.D.             | 100   |
|             | Compound 4 (11.4) |           | 18 μM            | 101   |
|             | CWI1-2 (11.5)     |           | 0.20–0.78 μM     | 19    |

| Target        | Name                 | Structure                                                                            | IC <sub>50</sub> | Ref. |
|---------------|----------------------|--------------------------------------------------------------------------------------|------------------|------|
| YTHDF         | Ebselen (11.6)       | 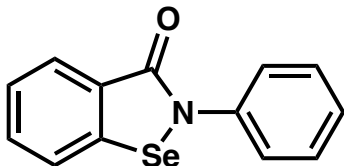   | 3.7 μM           | 104  |
|               | MS-444 (11.7)        |   | 2.1–3.7 μM       | 107  |
| HuR           | 1c (11.8)            |    | 4.7 μM           | 108  |
|               | SRI-42127 (11.9)     |   | N.D.             | 109  |
| AUF 1/hnRNP D | JNJ-7706621 (11.10)  |  | 0.11–0.51 μM     | 111  |
|               | Silvestrol (12.1)    |  | lower nM         | 112  |
| EIF4a         | Hippuristanol (12.2) |  | 0.80 μM          | 114  |
| EIF4e         | 4EGI-1 (12.3)        |  | 6 μM             | 115  |

| Target      | Name               | Structure                                                                            | IC <sub>50</sub> | Ref. |
|-------------|--------------------|--------------------------------------------------------------------------------------|------------------|------|
|             | Compound 12 (12.4) | 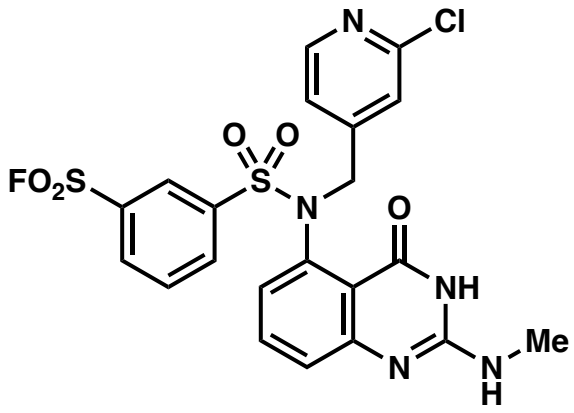   | 0.30 μM          | 116  |
| EIF4e cont. |                    |                                                                                      |                  |      |
|             | 094 (12.5)         |    | N.D.             | 118  |
| CPEB1       | ASR488 (12.6)      |   | 0.45–0.85 μM     | 120  |
| GRSF1       | VE-821 (12.7)      |  | 18 μM            | 121  |
| CELF1       | Compound 27 (12.8) |  | 23 μM            | 122  |
